# Supplementary material for: Rapid glacial retreat on the Kamchatka Peninsula during the early 21st Century
Source: Copernicus journal article supplement (doi:10.5194/tc-2016-42), 2016-03-10
Supplement: Supplementary file [file tc-2016-42-SC1-supplement.pdf]

**Scheme 1.** Tolbachik volcano glaciation. In the substrate ASTER (19.07.2012) satellite image.

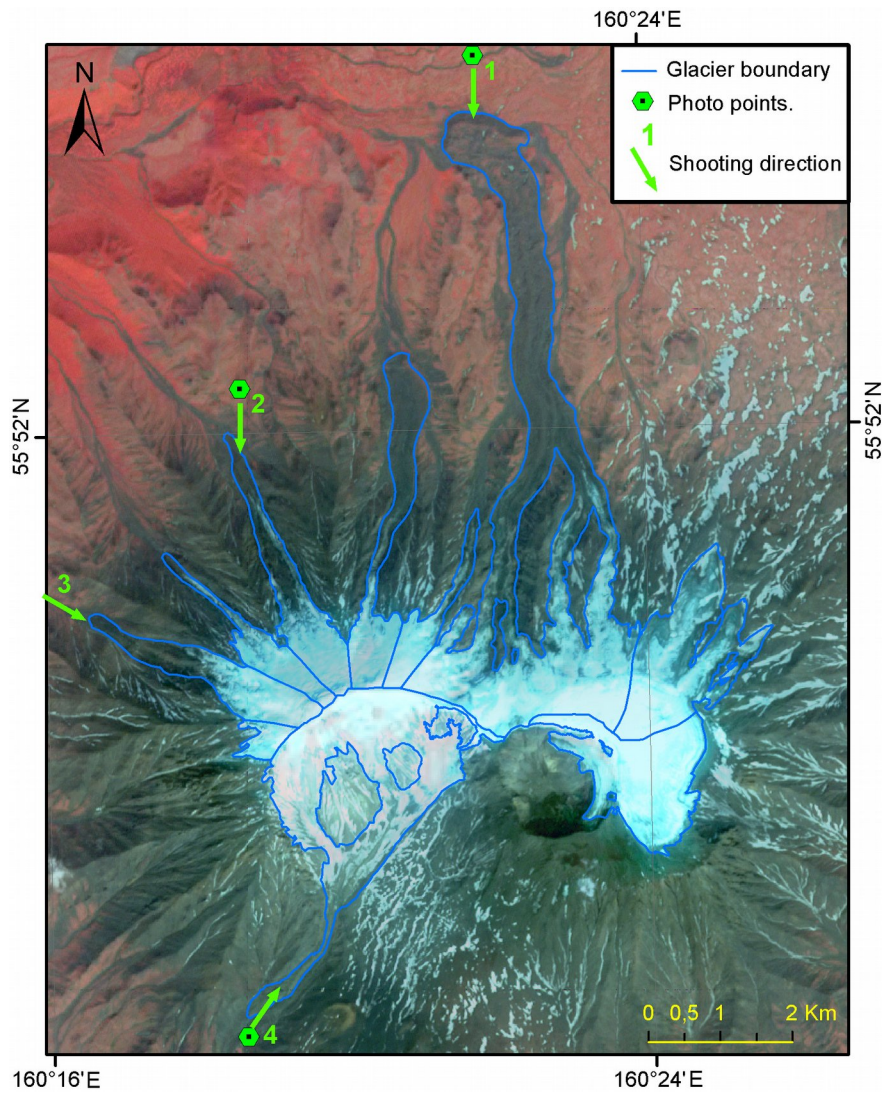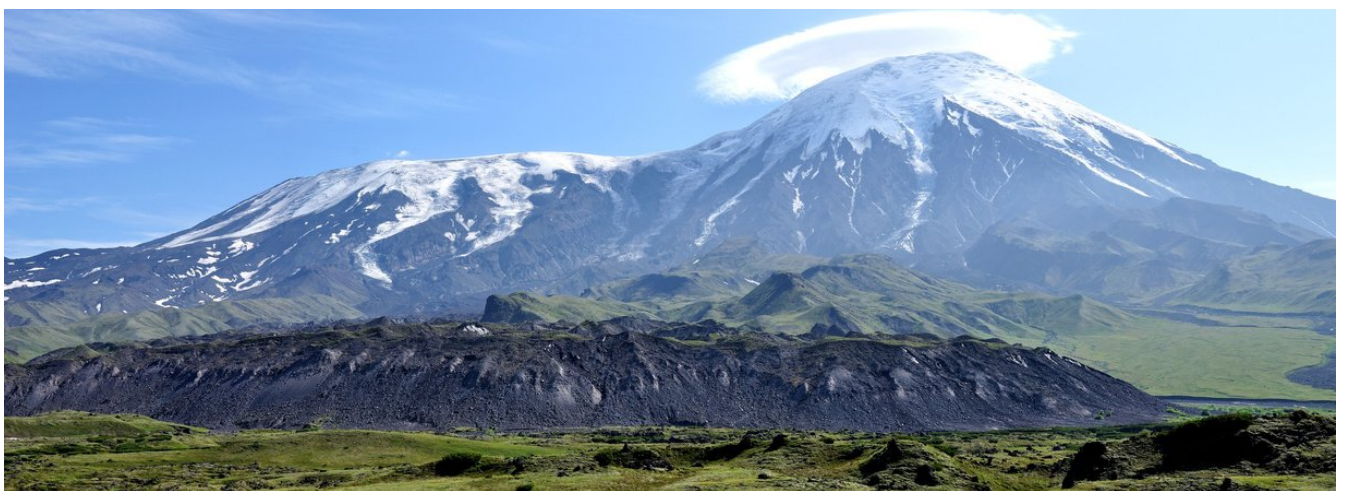

**Photo 1.** Institute of Vulcanology Glacier (№ 155) in August 2012.



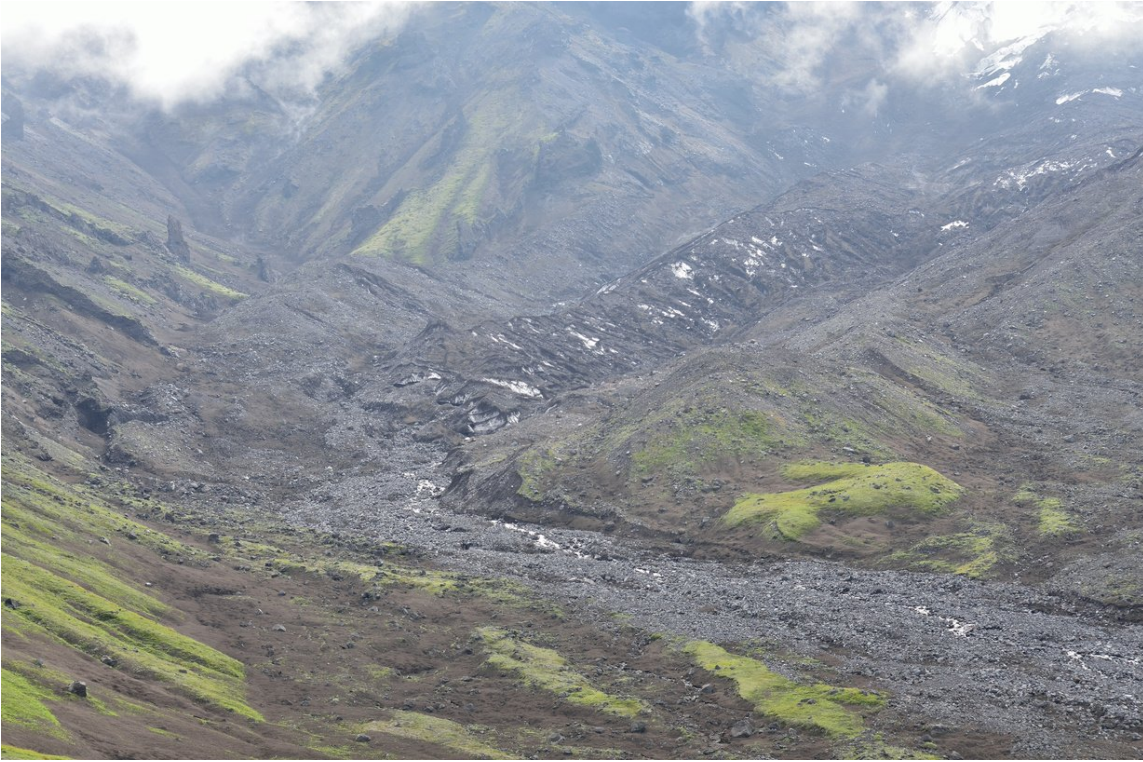

**Photo 2.** Vinogradova (№ 152) Glacier in august 2013.

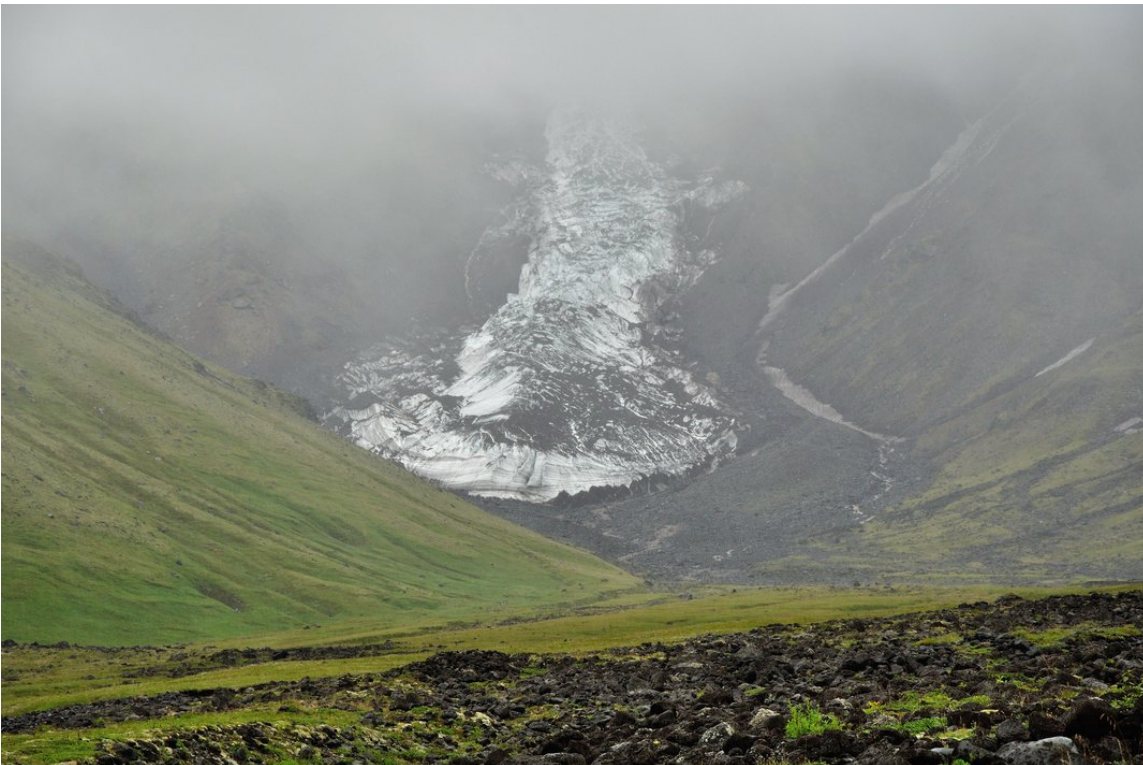

**Photo 3.** Kapel'ka Glacier (№ 150) in august 2012.



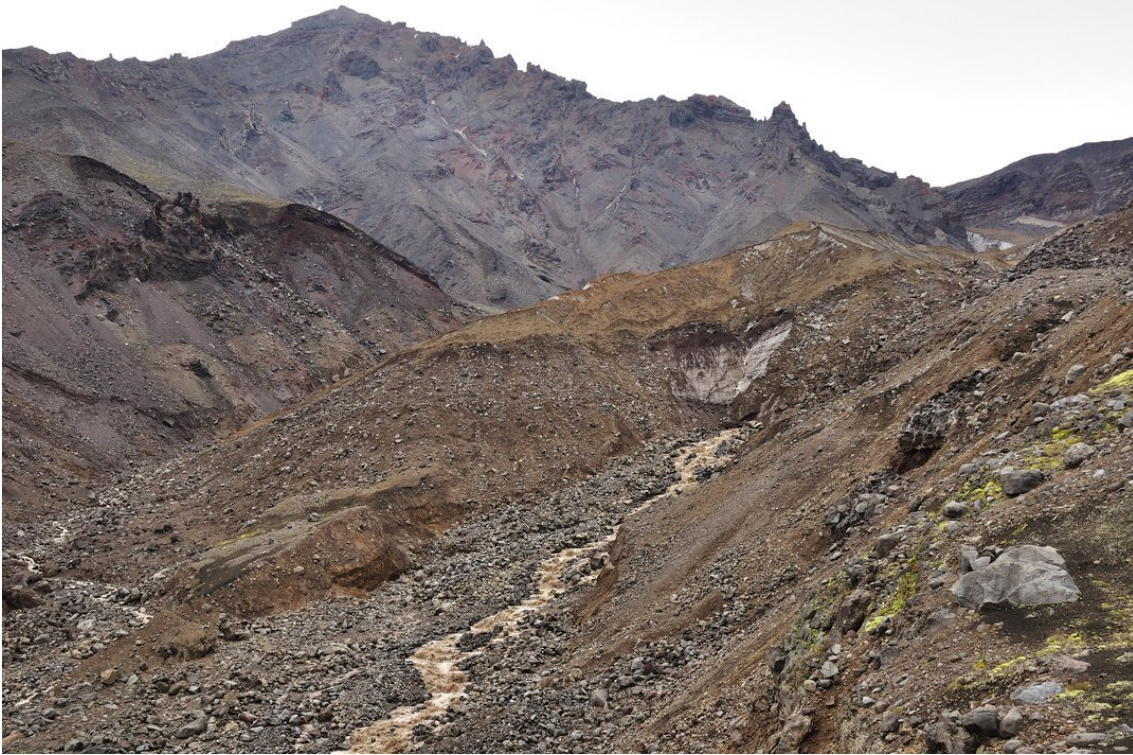

**Photo 4.** Cheremosnii Glacier (№ 147) in august 2011.
